# Supplementary material
Source: publisher figshare collection journal article supplement (https://asha.figshare.com/articles/dataset/_/20151848)
Supplement: Supplementary file 1 [file 1]

**Supplemental Material S6. Similarity effects when limiting analyses to first four or eight trials of each type (same, different-consonant, different-vowel, and dissimilar-word).**

|                 | First 4 trials |     |     |     | First 8 trials |     |     |     | All trials |     |     |     |
|-----------------|----------------|-----|-----|-----|----------------|-----|-----|-----|------------|-----|-----|-----|
|                 | Main           | C<V | C<D | V<D | Main           | C<V | C<D | V<D | Main       | C<V | C<D | V<D |
| Exp. 1          | ***            | ns  | *** | *** | ***            | **  | *** | **  | ***        | *** | *** | *** |
| Exp. 2          | ***            | *** | *** | **  | ***            | *** | *** | ns  | ***        | *** | *** | *   |
| Exp. 3<br>(all) |                |     |     |     | +              | ns  | *   | ns  | +          | ns  | *   | ns  |

\*\*\* $p \leq .0002$ . \*\* $p < .01$ . \* $p < .05$ . + $p < .05$ .

**Note.** Main = main effect. The outcomes in Experiments 1 and 2 show statistically robust effects of similarity (Trial Type) even when reduced to the same number of items as the analysis of Exp. 3 collapsed over Standardness (8 items per trial type) or in the Exp. 3  $2 \times 2$  ANOVA (4 items per trial type).
