# Supplementary material
Source: publisher figshare collection journal article supplement (https://asha.figshare.com/articles/dataset/_/20151848)
Supplement: Supplementary file 2 [file 1]

### Supplemental Material S1. Age of acquisition in production consonants.

According to Smit et al. (1990), 75% or more of children produce these sounds acceptably at the following ages (combined across initial and final positions). Children age 3 years 0 months (3;0) were the youngest tested.

| Sound   | Age produced (F) | Age produced (M) | More information  |
|---------|------------------|------------------|-------------------|
| b,p,d,t | 3;0              | 3;0              |                   |
| s       | 3;0              | 5;0              | (reversals noted) |
| z       | 5;0              | 6;0              |                   |
| f       | 3;0              | 3;6              |                   |
| v       | 4;0              | 4;6              |                   |

Fricatives seem to reach accurate production later than stops. It would be more informative to know what *sorts* of errors occurred for the later-produced sounds. If they are devoicing errors, and if errors reflect perceptual abilities, this would lead to greater rates of (say) s/z confusions than d/t confusions. However, Smit et al. (1990) note that most errors in older children are not voicing errors but dentalizations, which should not lead to s being confusable with z.

### Reference

Smit, A. B., Hand, L., Freilinger, J. J., Bernthal, J. E., & Bird, A. (1990). The Iowa Articulation Norms project and its Nebraska replication. *Journal of Speech and Hearing Disorders*, 55(4), 779–798. <https://doi.org/10.1044/jshd.5504.779>
