# Supplementary material
Source: publisher figshare collection journal article supplement (https://asha.figshare.com/articles/dataset/_/20151848)
Supplement: Supplementary file 3 [file 1]

### **Supplemental Material S2. Age of acquisition in production.**

The Smit et al. (1990) norms only test consonants. Templin (1957; see Appendix IV) tested vowel production ages of acquisition. The vowels tested in the current study were all highly accurate in young 3-year-olds.

| <b>Sound</b> | <b>Proportion accurate at 3;0</b> |
|--------------|-----------------------------------|
| I, I, E, a   | 100%                              |
| ^, U, u      | 98%                               |
| eI           | 93%                               |

### **References**

- Smit, A. B., Hand, L., Freilinger, J. J., Bernthal, J. E., & Bird, A. (1990). The Iowa Articulation Norms project and its Nebraska replication. *Journal of Speech and Hearing Disorders*, 55(4), 779–798. <https://doi.org/10.1044/jshd.5504.779>
- Templin, M. C. (1957). Appendix IV. Data on articulation of specific speech sounds. In *Certain Language Skills in Children: Their Development and Interrelationships*. University of Minnesota Press. <https://www.jstor.org/stable/10.5749/j.ctttv2st>
