# Supplementary material
Source: publisher figshare collection journal article supplement (https://asha.figshare.com/articles/dataset/_/20151848)
Supplement: Supplementary file 4 [file 1]

### Description of lists Exp. 3

Each list had a different standard stimulus, which occurred on 20 filler “same” trials. The eight standard stimuli spanned all vowels, and onset manner and voicing values. The dissimilar words in each set differed from the standard in place and voicing value of onset, but not manner. Manner was retained so that there was low similarity between the “standard” items and the “non-standard” items. Trials were pseudorandomly ordered so that at least one filler same trial occurred every three trials to maintain representation of the standard. However, there were no more than three trials in a row that had identical responses (all same or all different).

**Supplemental Material S5.** First four test lists for Experiment 3. The second set of four lists were identical (list1 = list5, list2 = list6, and so on) except that the standard stimuli were swapped with the nonstandard stimuli. For example, for list 5, zoof was the standard stimulus rather than beesh.

| Item | list1  |        |           | list2  |        |           | list3  |        |           | list4  |        |           |
|------|--------|--------|-----------|--------|--------|-----------|--------|--------|-----------|--------|--------|-----------|
|      | Sound1 | Sound2 | Type      |
| 1    | beesh  | beesh  | FILLER    | tayge  | tayge  | FILLER    | poohv  | poohv  | FILLER    | divv   | divv   | FILLER    |
| 2    | beesh  | bish   | diffV_std | fosh   | fush   | diffV_non | sudge  | sodge  | diffV_non | divv   | divv   | ID_std    |
| 3    | zoof   | fayfe  | dstnt_non | tayge  | boove  | dstnt_std | poohv  | poohv  | ID_std    | divv   | pish   | dstnt_std |
| 4    | beesh  | beesh  | FILLER    | tayge  | tayge  | FILLER    | poohv  | poohv  | FILLER    | divv   | divv   | FILLER    |
| 5    | beesh  | beesh  | ID_std    | fosh   | zodge  | dstnt_non | poohv  | boohv  | diffC_std | veff   | vayfe  | diffV_non |
| 6    | beesh  | peesh  | diffC_std | tayge  | tayge  | FILLER    | poohv  | poohv  | FILLER    | divv   | deeve  | diffV_std |
| 7    | beesh  | beesh  | FILLER    | fosh   | vosh   | diffC_non | poohv  | dedge  | dstnt_std | divv   | divv   | FILLER    |
| 8    | zoof   | zoof   | ID_non    | tayge  | tayge  | FILLER    | sudge  | zudge  | diffC_non | veff   | feff   | diffC_non |
| 9    | beesh  | beesh  | FILLER    | tayge  | dayge  | diffC_std | poohv  | poohv  | FILLER    | veff   | veff   | ID_non    |
| 10   | zoof   | soof   | diffC_non | tayge  | tayge  | ID_std    | poohv  | poohv  | FILLER    | divv   | divv   | FILLER    |
| 11   | beesh  | teeve  | dstnt_std | tayge  | tayge  | FILLER    | poohv  | poove  | diffV_std | veff   | soohf  | dstnt_non |
| 12   | beesh  | beesh  | FILLER    | fosh   | fosh   | ID_non    | sudge  | vush   | dstnt_non | divv   | divv   | FILLER    |
| 13   | zoof   | zoohf  | diffV_non | tayge  | tedge  | diffV_std | poohv  | poohv  | FILLER    | divv   | tivv   | diffC_std |
| 14   | beesh  | beesh  | FILLER    | tayge  | tayge  | FILLER    | sudge  | sudge  | ID_non    | divv   | divv   | FILLER    |
| 15   | beesh  | beesh  | FILLER    | fosh   | fosh   | ID_non    | sudge  | vush   | dstnt_non | veff   | soohf  | dstnt_non |
| 16   | zoof   | fayfe  | dstnt_non | tayge  | tedge  | diffV_std | poohv  | poohv  | FILLER    | divv   | divv   | FILLER    |
| 17   | beesh  | bish   | diffV_std | tayge  | tayge  | FILLER    | poohv  | poohv  | ID_std    | veff   | feff   | diffC_non |
| 18   | beesh  | beesh  | FILLER    | tayge  | boove  | dstnt_std | sudge  | sodge  | diffV_non | veff   | vayfe  | diffV_non |
| 19   | beesh  | teeve  | dstnt_std | tayge  | tayge  | FILLER    | poohv  | poohv  | FILLER    | divv   | divv   | FILLER    |
| 20   | beesh  | beesh  | FILLER    | fosh   | zodge  | dstnt_non | poohv  | poohv  | FILLER    | divv   | divv   | FILLER    |
| 21   | beesh  | peesh  | diffC_std | tayge  | dayge  | diffC_std | poohv  | poohv  | FILLER    | divv   | divv   | FILLER    |
| 22   | beesh  | beesh  | FILLER    | tayge  | tayge  | FILLER    | poohv  | poove  | diffV_std | divv   | deeve  | diffV_std |
| 23   | beesh  | beesh  | FILLER    | tayge  | tayge  | ID_std    | poohv  | poohv  | FILLER    | veff   | veff   | ID_non    |
| 24   | zoof   | soof   | diffC_non | tayge  | tayge  | FILLER    | sudge  | sudge  | ID_non    | divv   | divv   | FILLER    |
| 25   | zoof   | zoof   | ID_non    | fosh   | vosh   | diffC_non | poohv  | dedge  | dstnt_std | divv   | pish   | dstnt_std |
| 26   | beesh  | beesh  | FILLER    | tayge  | tayge  | FILLER    | poohv  | poohv  | FILLER    | divv   | divv   | FILLER    |
| 27   | beesh  | beesh  | ID_std    | tayge  | tayge  | FILLER    | sudge  | zudge  | diffC_non | divv   | tivv   | diffC_std |
| 28   | zoof   | zoohf  | diffV_non | fosh   | fush   | diffV_non | poohv  | boohv  | diffC_std | divv   | divv   | ID_std    |
| 29   | beesh  | beesh  | FILLER    | tayge  | tayge  | FILLER    | poohv  | poohv  | FILLER    | divv   | divv   | FILLER    |
| 30   | beesh  | beesh  | FILLER    | fosh   | fosh   | ID_non    | poohv  | dedge  | dstnt_std | divv   | pish   | dstnt_std |
| 31   | beesh  | beesh  | ID_std    | tayge  | tedge  | diffV_std | poohv  | poohv  | FILLER    | divv   | divv   | FILLER    |
| 32   | beesh  | teeve  | dstnt_std | tayge  | tayge  | FILLER    | poohv  | poove  | diffV_std | veff   | vayfe  | diffV_non |
| 33   | beesh  | beesh  | FILLER    | tayge  | tayge  | ID_std    | sudge  | sudge  | ID_non    | divv   | divv   | FILLER    |

|    |       |       |           |       |       |           |       |       |           |      |       |           |
|----|-------|-------|-----------|-------|-------|-----------|-------|-------|-----------|------|-------|-----------|
| 34 | beesh | peesh | diffC_std | tayge | dayge | diffC_std | poohv | poohv | FILLER    | veff | veff  | ID_non    |
| 35 | beesh | beesh | FILLER    | tayge | tayge | FILLER    | sudge | zudge | diffC_non | veff | soohf | dstnt_non |
| 36 | zoof  | zoohf | diffV_non | fosh  | vosh  | diffC_non | poohv | poohv | ID_std    | divv | divv  | FILLER    |
| 37 | beesh | beesh | FILLER    | fosh  | zodge | dstnt_non | poohv | poohv | FILLER    | divv | divv  | FILLER    |
| 38 | zoof  | zoof  | ID_non    | tayge | tayge | FILLER    | sudge | vush  | dstnt_non | divv | deeve | diffV_std |
| 39 | beesh | bish  | diffV_std | tayge | boove | dstnt_std | sudge | sodge | diffV_non | divv | divv  | ID_std    |
| 40 | beesh | beesh | FILLER    | fosh  | fush  | diffV_non | poohv | poohv | FILLER    | divv | divv  | FILLER    |
| 41 | zoof  | fayfe | dstnt_non | tayge | tayge | FILLER    | poohv | boohv | diffC_std | divv | tivv  | diffC_std |
| 42 | zoof  | soof  | diffC_non | tayge | tayge | FILLER    | poohv | poohv | FILLER    | veff | feff  | diffC_non |
| 43 | beesh | beesh | FILLER    | fosh  | fosh  | ID_non    | poohv | poohv | FILLER    | divv | divv  | FILLER    |
| 44 | beesh | bish  | diffV_std | tayge | boove | dstnt_std | poohv | dedge | dstnt_std | veff | feff  | diffC_non |
| 45 | zoof  | zoof  | ID_non    | tayge | tayge | FILLER    | poohv | poohv | FILLER    | divv | deeve | diffV_std |
| 46 | beesh | beesh | FILLER    | fosh  | vosh  | diffC_non | sudge | sudge | ID_non    | divv | divv  | FILLER    |
| 47 | zoof  | fayfe | dstnt_non | fosh  | zodge | dstnt_non | sudge | vush  | dstnt_non | veff | soohf | dstnt_non |
| 48 | beesh | beesh | FILLER    | tayge | tayge | FILLER    | poohv | poohv | FILLER    | divv | tivv  | diffC_std |
| 49 | zoof  | soof  | diffC_non | tayge | tayge | FILLER    | sudge | zudge | diffC_non | divv | divv  | FILLER    |
| 50 | beesh | beesh | ID_std    | tayge | tayge | FILLER    | poohv | poohv | ID_std    | divv | divv  | FILLER    |
| 51 | beesh | beesh | FILLER    | tayge | dayge | diffC_std | poohv | poohv | FILLER    | veff | vayfe | diffV_non |
| 52 | beesh | peesh | diffC_std | tayge | tayge | ID_std    | poohv | poove | diffV_std | divv | divv  | ID_std    |
| 53 | beesh | beesh | FILLER    | tayge | tayge | FILLER    | poohv | poohv | FILLER    | divv | divv  | FILLER    |
| 54 | zoof  | zoohf | diffV_non | tayge | tedge | diffV_std | sudge | sodge | diffV_non | divv | pish  | dstnt_std |
| 55 | beesh | teeve | dstnt_std | fosh  | fush  | diffV_non | poohv | boohv | diffC_std | veff | veff  | ID_non    |
| 56 | beesh | beesh | FILLER    | tayge | tayge | FILLER    | poohv | poohv | FILLER    | divv | divv  | FILLER    |

**Note.** ID = identical; diffC = different consonants; diffV = different vowels; dstnt = dissimilar words. Items with \_std are part of the standard stimulus set (the standard is the same as those on the same filler trials), those with \_non are part of the nonstandard stimulus set.
