# Supplementary material
Source: publisher figshare collection journal article supplement (https://asha.figshare.com/articles/dataset/_/20151848)
Supplement: Supplementary file 5 [file 1]

### Description of lists Exp. 1-2

There were no more than three of a given trial type in a row, no more than three expected “different” or “same” responses in a row, and no repeats of a recording from any trial to the next trial. Across lists, all possible different-consonant and different-vowel stimulus pairs occurred equally often, and both orders of a stimulus pair (deev-teev vs. teev-deev) occurred equally often. Sixteen maximally-different word pairs were used, 8 per list.

### Supplemental Material S4. All test lists for Experiments 1 and 2.

| Item | List 1 |        |       | List 2 |        |       | List 3 |        |       | List 4 |        |       |
|------|--------|--------|-------|--------|--------|-------|--------|--------|-------|--------|--------|-------|
|      | Sound1 | Sound2 | Type  |
| 1    | dedge  | dayge  | diffV | teeve  | deeve  | diffC | feff   | feff2  | ident | poove  | poove2 | ident |
| 2    | teeve  | tivv   | diffV | dayge  | dedge  | diffV | bish   | beesh  | diffV | boohv  | poohv  | diffC |
| 3    | zoohf  | zoof   | diffV | fosh   | vosh   | diffC | tayge  | tedge  | diffV | sodge  | zodge  | diffC |
| 4    | deeve  | deeve2 | ident | dedge  | dedge2 | ident | soohf  | beesh  | dstnt | tayge  | tayge2 | ident |
| 5    | fush   | vush   | diffC | peesh  | peesh2 | ident | boove  | boove2 | ident | pish   | peesh  | diffV |
| 6    | divv   | deeve  | diffV | vosh   | vush   | diffV | soohf  | zoohf  | diffC | poove  | zudge  | dstnt |
| 7    | dedge  | fosh   | dstnt | poohv  | poove  | diffV | zodge  | sodge  | diffC | peesh  | beesh  | diffC |
| 8    | vosh   | vosh2  | ident | zoohf  | zoohf2 | ident | tedge  | tedge2 | ident | veff   | veff2  | ident |
| 9    | tedge  | dedge  | diffC | feff   | deeve  | dstnt | zudge  | zodge  | diffV | divv   | fayfe  | dstnt |
| 10   | vayfe  | fayfe  | diffC | tivv   | teeve  | diffV | tivv   | divv   | diffC | zodge  | zudge  | diffV |
| 11   | boohv  | boove  | diffV | tayge  | dayge  | diffC | zoof   | pish   | dstnt | sudge  | sodge  | diffV |
| 12   | poohv  | poohv2 | ident | fosh   | fosh2  | ident | vayfe  | vayfe2 | ident | fayfe  | fayfe2 | ident |
| 13   | vosh   | tedge  | dstnt | boove  | boohv  | diffV | vosh   | fosh   | diffC | beesh  | bish   | diffV |
| 14   | poove  | poohv  | diffV | teeve  | veff   | dstnt | peesh  | zoohf  | dstnt | sudge  | boove  | dstnt |
| 15   | soof   | soohf  | diffV | zudge  | zudge2 | ident | zodge  | zodge2 | ident | zoof   | zoohf  | diffV |
| 16   | dayge  | dayge2 | ident | soof   | zoof   | diffC | beesh  | peesh  | diffC | sodge  | sodge2 | ident |
| 17   | sudge  | zudge  | diffC | poove  | boove  | diffC | vush   | vosh   | diffV | vayfe  | veff   | diffV |
| 18   | poohv  | boohv  | diffC | bish   | pish   | diffC | peesh  | pish   | diffV | zudge  | sudge  | diffC |
| 19   | soohf  | soohf2 | ident | divv   | divv2  | ident | tivv   | tivv2  | ident | deeve  | divv   | diffV |
| 20   | bish   | soof   | dstnt | vush   | fush   | diffC | feff   | veff   | diffC | boohv  | boohv2 | ident |
| 21   | sudge  | sudge2 | ident | vayfe  | tivv   | dstnt | fush   | dayge  | dstnt | feff   | fayfe  | diffV |
| 22   | tayge  | vush   | dstnt | soohf  | soof   | diffV | boove  | poove  | diffC | zodge  | poohv  | dstnt |
| 23   | fush   | fush2  | ident | vush   | vush2  | ident | pish   | pish2  | ident | teeve  | teeve2 | ident |
| 24   | fayfe  | feff   | diffV | boohv  | sodge  | dstnt | sodge  | sudge  | diffV | tedge  | tayge  | diffV |
| 25   | veff   | vayfe  | diffV | dedge  | tedge  | diffC | pish   | bish   | diffC | fayfe  | vayfe  | diffC |
| 26   | dayge  | tayge  | diffC | bish   | bish2  | ident | beesh  | beesh2 | ident | zoohf  | soohf  | diffC |
| 27   | zoof   | zoof2  | ident | fush   | fosh   | diffV | fosh   | fush   | diffV | soof   | soof2  | ident |
| 28   | deeve  | teeve  | diffC | veff   | feff   | diffC | zoof   | soof   | diffC | divv   | tivv   | diffC |
| 29   | zoof   | soof   | diffC | divv   | tivv   | diffC | deeve  | teeve  | diffC | veff   | feff   | diffC |
| 30   | fosh   | fush   | diffV | soof   | soof2  | ident | zoof   | zoof2  | ident | fush   | fosh   | diffV |

|    |       |        |       |       |        |       |       |        |       |       |        |       |
|----|-------|--------|-------|-------|--------|-------|-------|--------|-------|-------|--------|-------|
| 31 | beesh | beesh2 | ident | zoohf | soohf  | diffC | dayge | tayge  | diffC | bish  | bish2  | ident |
| 32 | pish  | bish   | diffC | fayfe | vayfe  | diffC | veff  | vayfe  | diffV | dedge | tedge  | diffC |
| 33 | sodge | sudge  | diffV | tedge | tayge  | diffV | fayfe | feff   | diffV | boohv | sodge  | dstnt |
| 34 | pish  | pish2  | ident | teeve | teeve2 | ident | fush  | fush2  | ident | vush  | vush2  | ident |
| 35 | boove | poove  | diffC | zodge | poohv  | dstnt | tayge | vush   | dstnt | soohf | soof   | diffV |
| 36 | fush  | dayge  | dstnt | feff  | fayfe  | diffV | sudge | sudge2 | ident | vayfe | tivv   | dstnt |
| 37 | feff  | veff   | diffC | boohv | boohv2 | ident | bish  | soof   | dstnt | vush  | fush   | diffC |
| 38 | tivv  | tivv2  | ident | deeve | divv   | diffV | soohf | soohf2 | ident | divv  | divv2  | ident |
| 39 | peesh | pish   | diffV | zudge | sudge  | diffC | poohv | boohv  | diffC | bish  | pish   | diffC |
| 40 | vush  | vosh   | diffV | vayfe | veff   | diffV | sudge | zudge  | diffC | poove | boove  | diffC |
| 41 | beesh | peesh  | diffC | sodge | sodge2 | ident | dayge | dayge2 | ident | soof  | zoof   | diffC |
| 42 | zodge | zodge2 | ident | zoof  | zoohf  | diffV | soof  | soohf  | diffV | zudge | zudge2 | ident |
| 43 | peesh | zoohf  | dstnt | sudge | boove  | dstnt | poove | poohv  | diffV | teeve | veff   | dstnt |
| 44 | vosh  | fosh   | diffC | beesh | bish   | diffV | vosh  | tedge  | dstnt | boove | boohv  | diffV |
| 45 | vayfe | vayfe2 | ident | fayfe | fayfe2 | ident | poohv | poohv2 | ident | fosh  | fosh2  | ident |
| 46 | zoof  | pish   | dstnt | sudge | sodge  | diffV | boohv | boove  | diffV | tayge | dayge  | diffC |
| 47 | tivv  | divv   | diffC | zodge | zudge  | diffV | vayfe | fayfe  | diffC | tivv  | teeve  | diffV |
| 48 | zudge | zodge  | diffV | divv  | fayfe  | dstnt | tedge | dedge  | diffC | feff  | deeve  | dstnt |
| 49 | tedge | tedge2 | ident | veff  | veff2  | ident | vosh  | vosh2  | ident | zoohf | zoohf2 | ident |
| 50 | zodge | sodge  | diffC | peesh | beesh  | diffC | dedge | fosh   | dstnt | poohv | poove  | diffV |
| 51 | soohf | zoohf  | diffC | poove | zudge  | dstnt | divv  | deeve  | diffV | vosh  | vush   | diffV |
| 52 | boove | boove2 | ident | pish  | peesh  | diffV | fush  | vush   | diffC | peesh | peesh2 | ident |
| 53 | soohf | beesh  | dstnt | tayge | tayge2 | ident | deeve | deeve2 | ident | dedge | dedge2 | ident |
| 54 | tayge | tedge  | diffV | sodge | zodge  | diffC | zoohf | zoof   | diffV | fosh  | vosh   | diffC |
| 55 | bish  | beesh  | diffV | boohv | poohv  | diffC | teeve | tivv   | diffV | dayge | dedge  | diffV |
| 56 | feff  | feff2  | ident | poove | poove2 | ident | dedge | dayge  | diffV | teeve | deeve  | diffC |

**Note.** Ident = identical; diffC = different consonants; diffV = different vowels; dstnt = dissimilar words. The number 2 is a second recording of the target word.
