# Supplementary material
Source: publisher figshare collection journal article supplement (https://asha.figshare.com/articles/dataset/_/20151848)
Supplement: Supplementary file 6 [file 1]

### Supplemental Material S3. Phonotactic probability of words.

These were calculated using the calculator described in Vitevitch and Luce (2004).

| Word           | Klattese | Phone1 | Phone2 | Phone3 | Biphone1 | Biphone2 | Summed<br>Unigram+1 | Summed<br>Bigram+1 |
|----------------|----------|--------|--------|--------|----------|----------|---------------------|--------------------|
| beesh          | biS      | 0.0512 | 0.0318 | 0.0077 | 0.0022   | 0.0002   | 1.0907              | 1.0024             |
| bish           | bIS      | 0.0512 | 0.0962 | 0.0077 | 0.0041   | 0.0012   | 1.1551              | 1.0053             |
| peesh          | piS      | 0.0844 | 0.0318 | 0.0077 | 0.0023   | 0.0002   | 1.1239              | 1.0025             |
| pish           | pIS      | 0.0844 | 0.0962 | 0.0077 | 0.0048   | 0.0012   | 1.1883              | 1.006              |
| boohv          | bUv      | 0.0512 | 0.0102 | 0.0236 | 0.0012   | 0.0000   | 1.085               | 1.0012             |
| boove          | buv      | 0.0512 | 0.0221 | 0.0236 | 0.0012   | 0.0004   | 1.0969              | 1.0016             |
| poohv          | pUv      | 0.0844 | 0.0102 | 0.0236 | 0.0009   | 0.0000   | 1.1182              | 1.0009             |
| poove          | puv      | 0.0844 | 0.0221 | 0.0236 | 0.0002   | 0.0004   | 1.1301              | 1.0006             |
| dayge          | deJ      | 0.0518 | 0.0292 | 0.0108 | 0.0015   | 0.0007   | 1.0918              | 1.0022             |
| dedge          | dEJ      | 0.0518 | 0.0729 | 0.0108 | 0.0071   | 0.0016   | 1.1355              | 1.0087             |
| tayge          | teJ      | 0.0445 | 0.0292 | 0.0108 | 0.0012   | 0.0007   | 1.0845              | 1.0019             |
| tedge          | tEJ      | 0.0445 | 0.0729 | 0.0108 | 0.0063   | 0.0016   | 1.1282              | 1.0079             |
| deev           | div      | 0.0518 | 0.0318 | 0.0236 | 0.0030   | 0.0014   | 1.1072              | 1.0044             |
| div            | dIv      | 0.0518 | 0.0962 | 0.0236 | 0.0152   | 0.0031   | 1.1716              | 1.0183             |
| teev           | tiv      | 0.0445 | 0.0318 | 0.0236 | 0.0012   | 0.0014   | 1.0999              | 1.0026             |
| tiv            | tIv      | 0.0445 | 0.0962 | 0.0236 | 0.0025   | 0.0031   | 1.1643              | 1.0056             |
| fosh           | faS      | 0.0466 | 0.0605 | 0.0077 | 0.0019   | 0.0002   | 1.1148              | 1.0021             |
| fush           | f^S      | 0.0466 | 0.0392 | 0.0077 | 0.0010   | 0.0004   | 1.0935              | 1.0014             |
| vosh           | vaS      | 0.0224 | 0.0605 | 0.0077 | 0.0010   | 0.0002   | 1.0906              | 1.0012             |
| vush           | v^S      | 0.0224 | 0.0392 | 0.0077 | 0.0007   | 0.0004   | 1.0693              | 1.0011             |
| fayfe          | fef      | 0.0466 | 0.0292 | 0.0197 | 0.0019   | 0.0004   | 1.0955              | 1.0023             |
| feff           | fEf      | 0.0466 | 0.0729 | 0.0197 | 0.0027   | 0.0015   | 1.1392              | 1.0042             |
| vayfe          | vef      | 0.0224 | 0.0292 | 0.0197 | 0.0012   | 0.0004   | 1.0713              | 1.0016             |
| veff           | vEf      | 0.0224 | 0.0729 | 0.0197 | 0.0035   | 0.0015   | 1.115               | 1.005              |
| sodge          | saJ      | 0.1024 | 0.0605 | 0.0108 | 0.0022   | 0.0009   | 1.1737              | 1.0031             |
| sudge          | s^J      | 0.1024 | 0.0392 | 0.0108 | 0.0059   | 0.0005   | 1.1524              | 1.0064             |
| zodge          | zaJ      | 0.0026 | 0.0605 | 0.0108 | 0.0001   | 0.0009   | 1.0739              | 1.001              |
| zudge          | z^J      | 0.0026 | 0.0392 | 0.0108 | 0.0000   | 0.0005   | 1.0526              | 1.0005             |
| soof           | suf      | 0.1024 | 0.0221 | 0.0197 | 0.0023   | 0.0004   | 1.1442              | 1.0027             |
| soohf          | sUf      | 0.1024 | 0.0102 | 0.0197 | 0.0003   | 0.0002   | 1.1323              | 1.0005             |
| zoof           | zuf      | 0.0026 | 0.0221 | 0.0197 | 0.0001   | 0.0004   | 1.0444              | 1.0005             |
| zoohf          | zUf      | 0.0026 | 0.0102 | 0.0197 | 0.0000   | 0.0002   | 1.0325              | 1.0002             |
| Onsets (means) | b        | 0.0512 | 0.0401 | 0.0157 | 0.0022   | 0.0005   | 1.1069              | 1.0026             |
|                | p        | 0.0844 | 0.0401 | 0.0157 | 0.0021   | 0.0005   | 1.1401              | 1.0025             |
|                | d        | 0.0518 | 0.0575 | 0.0172 | 0.0067   | 0.0017   | 1.1265              | 1.0084             |
|                | t        | 0.0445 | 0.0575 | 0.0172 | 0.0028   | 0.0017   | 1.1192              | 1.0045             |

|                |   |        |        |        |        |        |        |        |
|----------------|---|--------|--------|--------|--------|--------|--------|--------|
|                | f | 0.0466 | 0.0505 | 0.0137 | 0.0019 | 0.0006 | 1.1108 | 1.0025 |
|                | v | 0.0224 | pho    | 0.0137 | 0.0016 | 0.0006 | 1.0866 | 1.0022 |
|                | s | 0.1024 | 0.0330 | 0.0153 | 0.0027 | 0.0005 | 1.1507 | 1.0032 |
|                | z | 0.0026 | 0.0330 | 0.0153 | 0.0001 | 0.0005 | 1.0509 | 1.0006 |
| Vowels (means) | i | 0.0580 | 0.0318 | 0.0157 | 0.0022 | 0.0008 | 1.1054 | 1.0030 |
|                | I | 0.0580 | 0.0962 | 0.0157 | 0.0067 | 0.0022 | 1.1698 | 1.0088 |
|                | e | 0.0413 | 0.0292 | 0.0153 | 0.0015 | 0.0006 | 1.0858 | 1.0020 |
|                | E | 0.0413 | 0.0729 | 0.0153 | 0.0049 | 0.0016 | 1.1295 | 1.0065 |
|                | u | 0.0602 | 0.0221 | 0.0217 | 0.0010 | 0.0004 | 1.1039 | 1.0014 |
|                | U | 0.0602 | 0.0102 | 0.0217 | 0.0006 | 0.0001 | 1.0920 | 1.0007 |
|                | a | 0.0435 | 0.0605 | 0.0093 | 0.0013 | 0.0006 | 1.1133 | 1.0019 |
|                | ^ | 0.0435 | 0.0392 | 0.0093 | 0.0019 | 0.0005 | 1.0920 | 1.0024 |

---

## Reference

Vitevitch, M. S., & Luce, P. A. (2004). A web-based interface to calculate phonotactic probability for words and nonwords in English. *Behavior Research Methods, Instruments, & Computers*, 36(3), 481–487. <https://doi.org/10.3758/BF03195594>
